# Supplementary material
Source: PubMed Central journal article supplement (PMC4233167)
Supplement: NIHMS610710-supplement-Appendix.pdf [file NIHMS610710-supplement-Appendix.pdf]

**Web Appendix Tables and Figure**

**High Burden of STIs among HIV-Infected Adults Prior to Initiation of ART in South Africa: A Retrospective Cohort Study**

**Mark N. LURIE, Kipruto KIRWA, Johann DANIELS, Marcel BERTELER, Seth C KALICHMAN, Catherine MATHEWS**

**Table 1: Adjusted rate ratios and 95% confidence limits of STI incidence while excluding infections that were recorded on the day the participant entered<sup>a</sup> the study. The results are similar to the main findings.**

| Characteristic             | <i>n</i> | Rate ratio <sup>b</sup> (95% CL) | <i>P</i> value |
|----------------------------|----------|----------------------------------|----------------|
| ART                        |          |                                  |                |
| On ART                     | 1,465    | 1 (Ref)                          |                |
| Before ART                 | 1,465    | 4.66 (3.07, 7.06)                | <0.001         |
| Gender                     |          |                                  |                |
| Female                     | 949      | 1 (Ref)                          |                |
| Male                       | 516      | 1.42 (0.93, 2.17)                | 0.103          |
| Age at study entry (years) |          |                                  |                |
| ≥35                        | 498      | 1 (Ref)                          |                |
| 25 – 34                    | 715      | 2.18 (1.52, 3.97)                | 0.003          |
| <25                        | 252      | 2.50 (1.38, 4.54)                | 0.003          |
| CD4 count at ART start     |          |                                  |                |
| <200                       | 991      | 1 (Ref)                          |                |
| ≥200                       | 474      | 1.40 (0.96, 2.04)                | 0.079          |
| WHO stage at ART start     |          |                                  |                |
| Stages 1 and 2             | 401      | 1 (Ref)                          |                |
| Stage 3                    | 812      | 0.99 (0.66, 1.50)                | 0.981          |
| Stage 4                    | 252      | 0.34 (0.15, 0.79)                | 0.012          |
| TB at ART start            |          |                                  |                |
| No                         | 1,083    | 1 (Ref)                          |                |
| Yes                        | 382      | 0.77 (0.44, 1.32)                | 0.341          |

<sup>a</sup>This sensitivity analysis is to further exclude the possibility of bias that may result if infections recorded at the beginning of follow-up are prevalent rather than incident. Note however that PREHMIS data distinguishes between prevalent and new infections, and our main analysis focussed only on incident infections.

<sup>b</sup>Adjustment made for ART status, age, gender, and CD4+ cell count, WHO stage of disease, and therapy for TB at the start of ART.

STI, Sexually Transmitted Infections; CL, Confidence Limits; ART, Anti-retroviral Therapy; TB, Tuberculosis.

**Table 2: Adjusted rate ratios and 95% confidence limits of STI incidence among a subset of 545 HIV-infected participants who contributed similar<sup>a</sup> amounts of follow-up time before and after ART initiation.**

| Characteristic             | <i>n</i> | Rate ratio <sup>b</sup> (95% CL) | <i>P</i> value |
|----------------------------|----------|----------------------------------|----------------|
| ART                        |          |                                  |                |
| On ART                     | 545      | 1 (Ref)                          |                |
| Before ART                 | 545      | 6.40 (3.45, 11.68)               | <0.001         |
| Gender                     |          |                                  |                |
| Female                     | 320      | 1 (Ref)                          |                |
| Male                       | 225      | 2.05 (1.09, 3.86)                | 0.026          |
| Age at study entry (years) |          |                                  |                |
| ≥35                        | 224      | 1 (Ref)                          |                |
| 25 – 34                    | 242      | 3.23 (1.47, 7.08)                | <0.001         |
| <25                        | 79       | 3.23 (1.21, 8.72)                | 0.001          |
| CD4 count at ART start     |          |                                  |                |
| <200                       | 372      | 1 (Ref)                          |                |
| ≥200                       | 173      | 1.55 (0.85, 2.81)                | 0.150          |
| WHO stage at ART start     |          |                                  |                |
| Stages 1 and 2             | 143      | 1 (Ref)                          |                |
| Stage 3                    | 307      | 0.83 (0.43, 1.62)                | 0.589          |
| Stage 4                    | 95       | 0.27 (0.07, 0.94)                | 0.040          |
| TB at ART start            |          |                                  |                |
| No                         | 374      | 1 (Ref)                          |                |
| Yes                        | 141      | 0.78 (0.35, 1.74)                | 0.546          |

<sup>a</sup>Participants' pre- and on-ART person-time differed by less than 1 year.

<sup>b</sup>Adjustment made for ART status, age, gender, and CD4+ cell count, WHO stage of disease, and therapy for TB at the start of ART.

STI, Sexually Transmitted Infections; CL, Confidence Limits; ART, Anti-retroviral Therapy; TB, Tuberculosis.

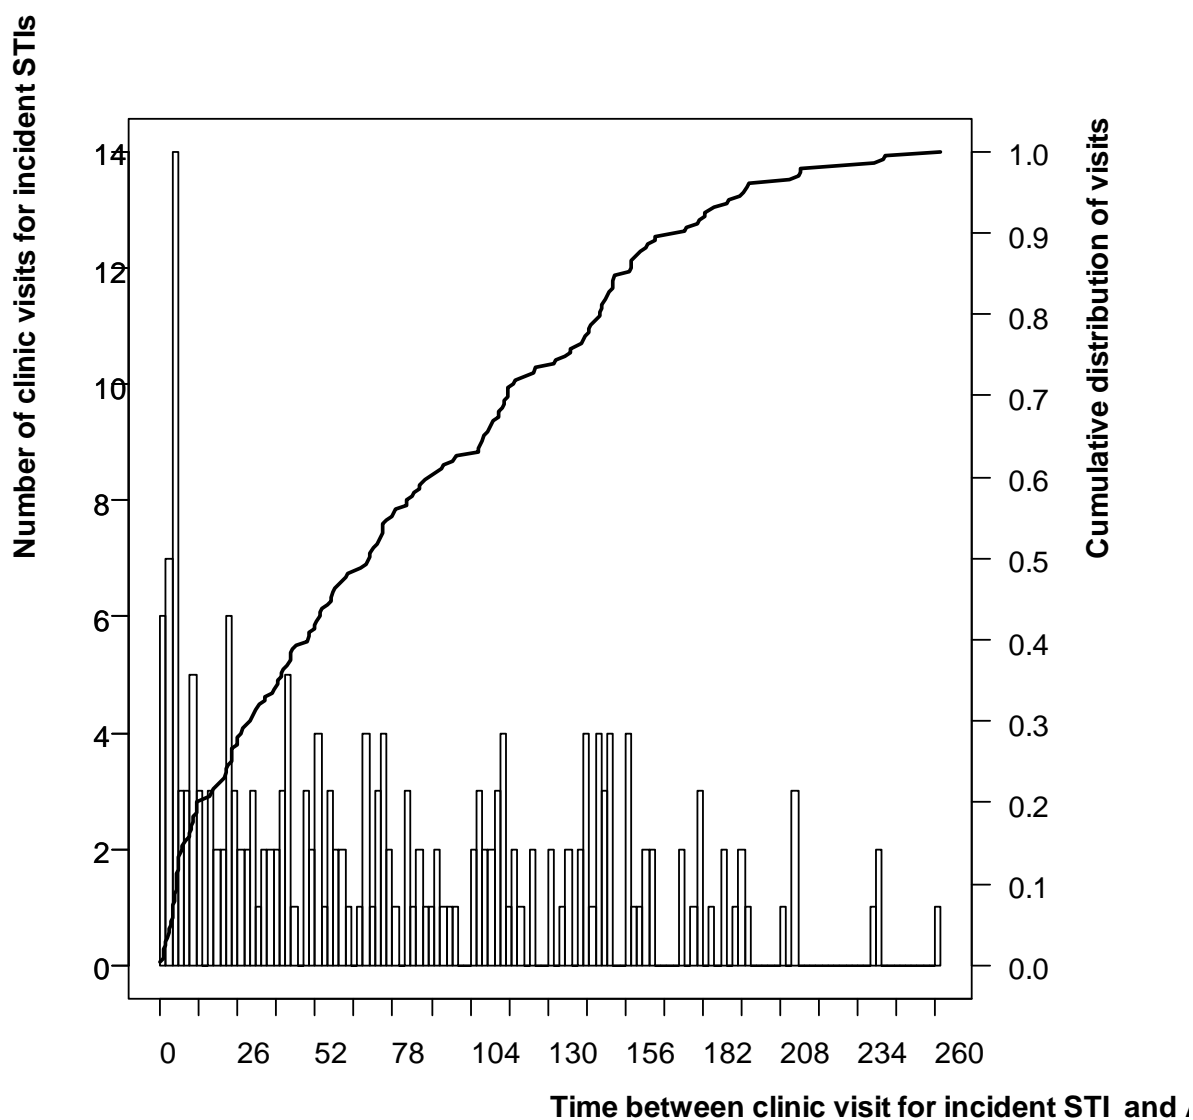

**Figure 1. Distribution of time from treatment for new STI episode before ART to initiation of ART. Only 6.9% and 28.1% of pre-ART visits happened within 4 and 24 weeks (1-6 months) before ART initiation, respectively. The right Y-axis annotates the cumulative distribution curve.**
